# Supplementary material for: Controlling and prevention of surface wrinkling via size-dependent critical wrinkling strain
Source: Royal Society of Chemistry journal article supplement (doi:10.1039/c5sm00761e), 2015-01-01
Supplement: c5sm00761e1.pdf [file c5sm00761e1.pdf]

### Supporting Information

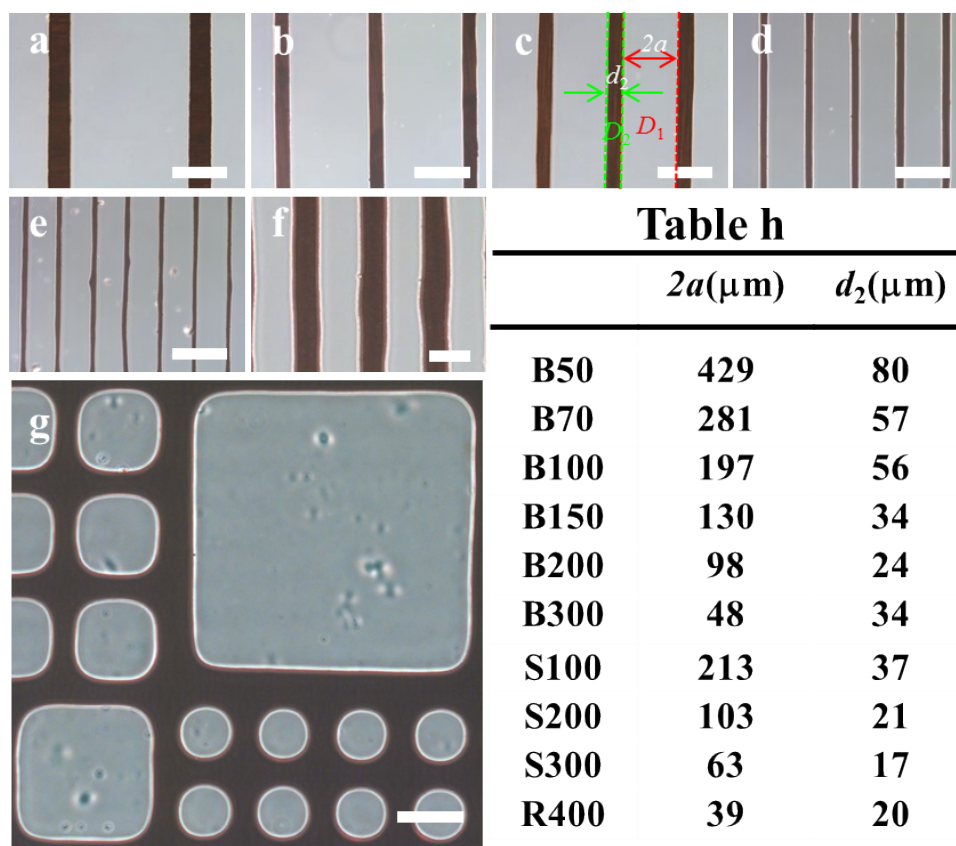

**Figure S1.** Optical images (a-g) and the corresponding information (h) of the exposed area ( $D_1$ ) and unexposed area ( $D_2$ ) of different morphologies of Cu grids: (a) 50 mesh-sized striped hole (B50); (b) 70 mesh-sized striped hole (B70); (c) 100 mesh-sized striped hole (B100); (d) 150 mesh-sized striped hole (B150); (e) 200 mesh-sized striped hole (B200); (f) 300 mesh-sized striped hole (B300); (g) simultaneously containing 100, 200, 300 mesh-sized square hole (S100, S200, S300) and 400 mesh-sized round hole (R400). Scale bars in f and g correspond to 50  $\mu\text{m}$ , while the rest of scale bars correspond to 200  $\mu\text{m}$ .

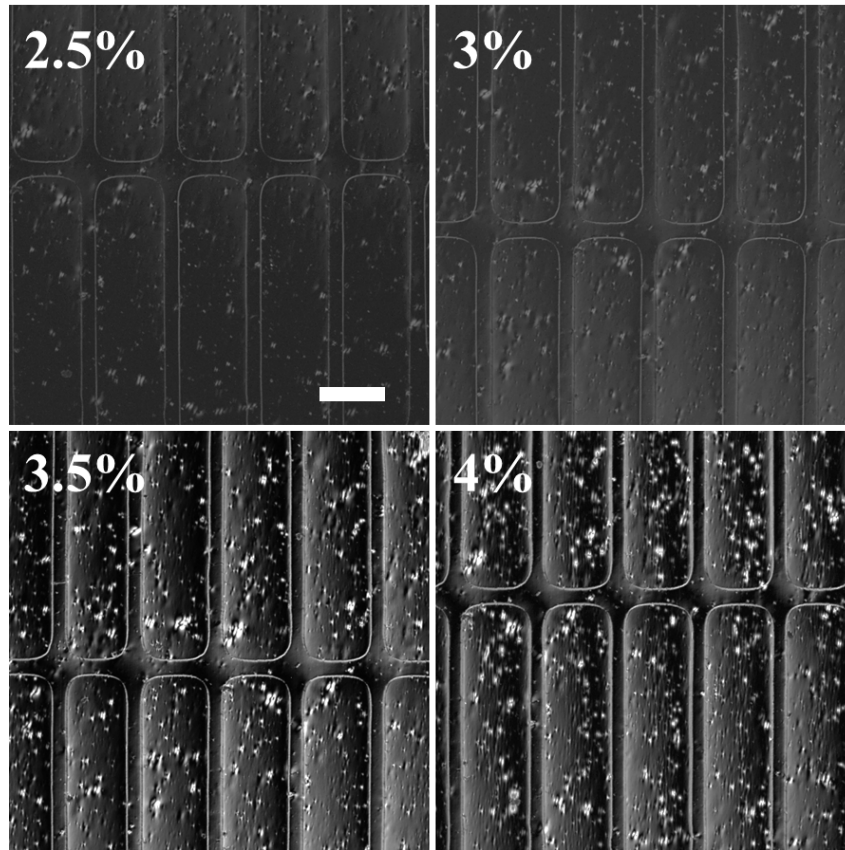

**Figure S2.** 3D laser microscope images of the surface morphological evolution of  $D_1$  regions from B100 with increasing relief of the pre-strain after 30 min' selective OP exposure. Scale bar equal to 200  $\mu\text{m}$  is applied in all images.

The 3D laser microscope images show that the critical wrinkling strain in the  $D_1$  regions from B100 after  $t_{\text{OP}}=30$  min is  $\sim 3.5\%$ , which is well consistent with the characterization result from optical microscope ( $\sim 3.5\%$ , Fig. 2d<sub>4</sub>).

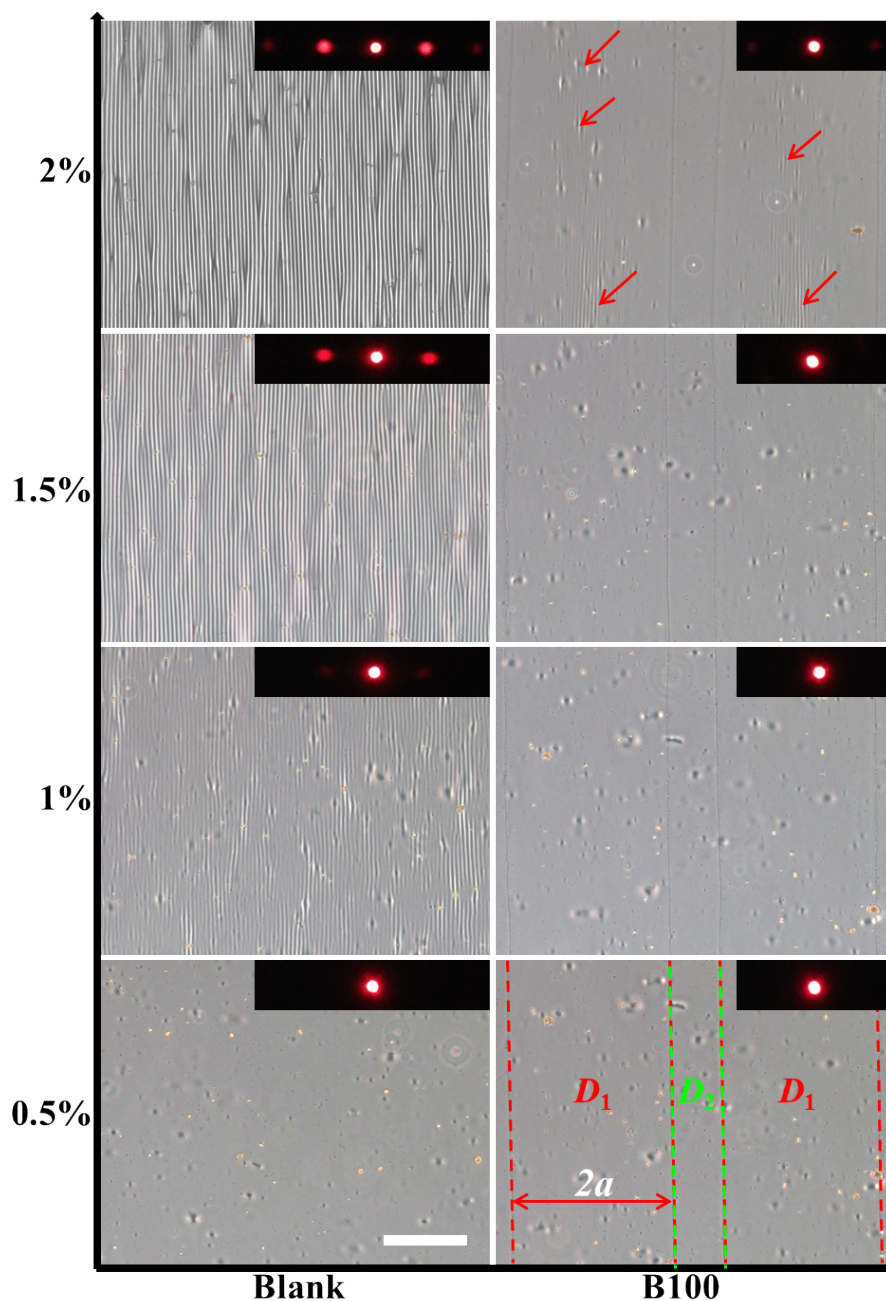

**Figure S3.** Optical microscope images of the surface morphological evolution of the blank region and  $D_1$  regions from B100 with increasing relief of pre-strain after 10 min' selective OP exposure and the respective diffraction pattern obtained through laser irradiation. Scale bar equal to 100  $\mu\text{m}$  is applied in all images.

It can be seen that the evident diffraction patterns through laser irradiating the blank region and  $D_1$  regions just appear at the compressive strain of 1% and 2%, respectively, indicative of the onset of surface wrinkling. Thus the diffraction pattern characterization results are also consistent with the optical microscope characterization results shown in Fig. 3.

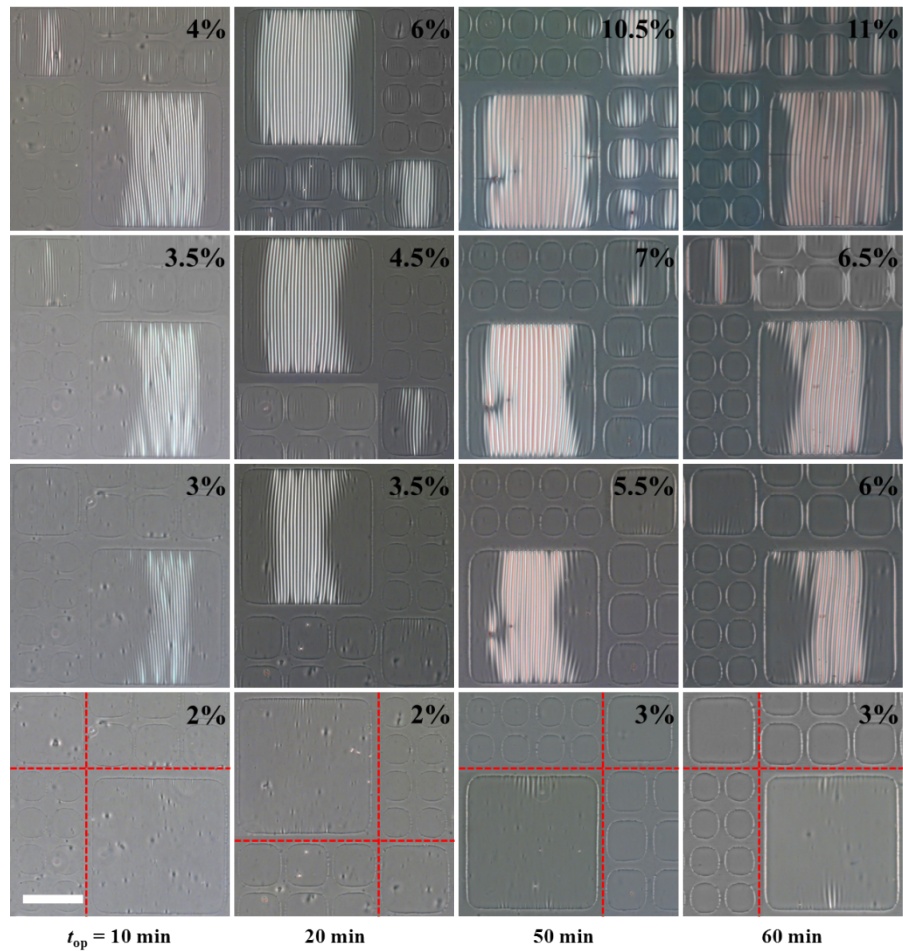

**Figure S4.** Optical images of the surface morphological evolution of  $D_1$  regions with increasing relief of pre-strain after different  $t_{OP}$  in the case of composite Cu grid applied. Each image from the same composite Cu grid is divided into four parts by the red dotted lines: S100, S200, S300, and R400. Scale bar equal to  $100\ \mu\text{m}$  is applied in all images.
